# Supplementary material for: Selective interactions of Co2+–Ca2+–concanavalin A with high mannose N-glycans
Source: Royal Society of Chemistry journal article supplement (doi:10.1039/d3dt03575a), 2023-12-05
Supplement: d3dt03575a1.pdf [file d3dt03575a1.pdf]

## Electronic Supplementary Information

### Selective interaction of $\text{Co}^{2+}$ – $\text{Ca}^{2+}$ –concanavalin A with high mannose *N*-glycans

Yunha Hwang,<sup>a</sup> Jae-hee Jeong,<sup>b</sup> Dong-Heon Lee,<sup>a</sup> and Seung Jae Lee<sup>\*a,c</sup>

<sup>a</sup>Department of Chemistry, Jeonbuk National University, Jeonju 54896, Republic of Korea

<sup>b</sup>Pohang Accelerator Laboratory, Pohang University of Science and Technology, Pohang 37673,  
Republic of Korea

<sup>c</sup>Institute of Molecular Biology and Genetics, Jeonbuk National University 54896, Republic of  
Korea

\*Address for correspondence:

Seung Jae Lee, [slee026@jbnu.ac.kr](mailto:slee026@jbnu.ac.kr)

Department of Chemistry and Institute of Molecular Biology and Genetics,

Jeonbuk National University, Jeonju 54896, Republic of Chemistry

Tel. +82-63-270-3412

Fax. +82-63-270-3408

## Supplementary materials and methods

### 1. Crystallization, data collection and structure determination of $\text{Co}^{2+}$ - $\text{Ca}^{2+}$ -Concanavalin A

The initial crystallization conditions were tested with crystallization kits, such as Crystal Screen 1<sup>TM</sup> and 2<sup>TM</sup> (Hampton Research, California, USA) in 24-well Crystallization Plates (Hampton Research, California, USA). Concanavalin A (ConA) isolated from *Canavalia ensiformis* (Jack bean) was purchased from Sigma (C2010; St. Louis, MO, USA). A total of 2.0  $\mu\text{L}$  mixture of the *Canavalia ensiformis* (Jack bean) Con A (2 mg/mL) in buffer (20 mM Tris, 50 mM NaCl, pH 7.4) and an equal volume of crystallization solution were equilibrated against 800  $\mu\text{L}$  reservoir solution at 22 °C. Crystals were obtained in the #25 condition (0.01 M cobalt(II) chloride hexahydrate, 0.1 M MES monohydrate pH 6.5, 1.8 M ammonium sulfate) using Crystal Screen 2<sup>TM</sup> crystallization kit. For the native data collection, a single crystal was cryoprotected with the reservoir solution supplemented with 30% sucrose and flash-frozen directly in a  $-173^\circ\text{C}$  nitrogen stream using a nylon loop. A dataset consisting of 360 frames with  $1^\circ$  oscillation at a wavelength of 1.0 was collected using an DECTRIS EIGER X 9M detector at beamline 5C of the Pohang Light Source II (PLS II) at the Pohang Accelerator Laboratory (PAL, Pohang, Korea).

Data reduction and scaling were processed using X-ray Detector Software (XDS).<sup>1</sup> Molecular replacement computations with  $\text{Mn}^{2+}$ - $\text{Ca}^{2+}$ -ConA (PDB accession 5YGM) were performed using the program Phaser.<sup>2</sup> Model building and refinement were accomplished using Coot and PHENIX.refine.<sup>3, 4</sup> Manual model building of missing parts and subsequent refinement were performed several times with Coot4 and Refmac5, respectively, using native data at a resolution of 2.83 Å.<sup>5</sup> The refinement statistics are presented in Table S1. The atomic coordinates and structure factors were deposited in the Protein Data Bank using the accession code 8I7Q ([www.rcsb.org/pdb](http://www.rcsb.org/pdb)). The final refined model contains  $\text{Co}^{2+}$ - $\text{Ca}^{2+}$ -ConA with  $R_{\text{work}}$  and  $R_{\text{free}}$  values of 0.258 and 0.297, respectively.

**Table S1.** Data collection and refinement statistics for Co(II)-Ca(II)-Concanavalin A

| Statistics                            | Co(II)-Ca(II)-Concanavalin A |
|---------------------------------------|------------------------------|
| <b>Data collection</b>                |                              |
| Space group                           | I 2 2 2                      |
| Cell dimensions (Å)                   |                              |
| a, b, c (Å)                           | 61.82, 86.05, 88.6           |
| $\alpha$ , $\beta$ , $\gamma$ (°)     | 90, 90, 90                   |
| Resolution (Å)                        | 27.93 – 2.83 (2.93 – 2.83) * |
| $R_{\text{merge}}^a$                  | 0.276 (1.573)                |
| $I / \sigma I$                        | 7.7 (2.1)                    |
| $CC_{1/2}^b$                          | 0.996 (0.908)                |
| Reflections, total / unique           | 76423 / 5904                 |
| Completeness (%)                      | 99.9 (100.0)                 |
| Redundancy                            | 12.9 (13.7)                  |
| <b>Structure refinement</b>           |                              |
| Resolution (Å)                        | 27.93 - 2.83                 |
| Reflections                           | 5,882                        |
| $R_{\text{work}}^c / R_{\text{free}}$ | 0.258 / 0.297                |
| Wilson B factor (Å <sup>2</sup> )     | 58.68                        |
| No. atoms, protein / water            | 1,807 / 19                   |
| R.m.s.deviation                       |                              |
| Bond lengths (Å)                      | 0.005                        |
| Angles (°)                            | 0.93                         |
| Rotamer outliers (%)                  | 0.99                         |
| Average B-factor (Å <sup>2</sup> )    | 63.88                        |
| Protein                               | 63.87                        |
| Ligands                               | 60.74                        |
| Solvent                               | 65.13                        |
| Ramachandran plot (%)                 |                              |
| Favored region                        | 97.02                        |
| Allowed region                        | 2.98                         |

\*Values in parentheses are for highest-resolution shell.

<sup>a</sup>  $R_{\text{merge}} = \sum |I_{\text{obs}} - I_{\text{avg}}| / I_{\text{obs}}$ , where  $I_{\text{obs}}$  is the observed intensity of individual reflection and  $I_{\text{avg}}$  is the average over symmetry equivalents

<sup>b</sup>  $CC_{1/2} = \text{Pearson correlation coefficient between two random half datasets.}$

<sup>c</sup>  $R_{\text{work}} = \sum ||F_{\text{o}}| - |F_{\text{c}}|| / \sum |F_{\text{o}}|$ , where  $|F_{\text{o}}|$  and  $|F_{\text{c}}|$  are the observed and calculated structure factor amplitudes, respectively. The  $R_{\text{free}}$  was calculated using 5% of the data.

## 2. Measurements of fluorescence anisotropy between *N*-glycans-2AB and concanavalin A

2-Aminobenzamide (AB)-labeled oligomannose oligosaccharide with 9 mannosyl residues (Ludger, 2AB-labeled Man<sub>9</sub> glycan, CAB-MAN9-01), 2AB-labeled asialo, galactosylated triantennary oligosaccharide (Ludger, 2AB-labeled NA<sub>3</sub> glycan, CAB-NA3-01), 2AB-labeled asialo, agalactosylated triantennary oligosaccharide (Ludger, 2AB-labeled NGA<sub>3</sub> glycan, CAB-NGA3-01) and 2AB-labeled sialylated triantennary oligosaccharide (Ludger, 2AB-labeled A<sub>3</sub> glycan, CAB-A3-01) were purchased for the fluorescence anisotropy (FA) experiment.<sup>6</sup> Man<sub>9</sub>-2AB has α-D-mannose as its terminal carbohydrates. NA<sub>3</sub>-2AB has β-D-galactose as its terminal carbohydrates. NGA<sub>3</sub>-2AB has β-N-acetyl-D-glucosamine as its terminal carbohydrates. A<sub>3</sub>-2AB has α-N-acetyl-D-neuraminic acid as its terminal carbohydrates.

*N*-glycans-2AB binding to ConA was observed using the FA. The FA was measured by FP8300 (JASCO, Japan) using cuvettes (JASCO, J/3 type, material Q [10 x 10 mm]). The excitation and emission of *N*-glycans-2AB were measured at 337 and 433 nm.<sup>6</sup> All experiments were measured at parameters including bandwidth: 5 nm, response: 1.0 sec, and PMT voltage: 800 V, at 25 °C. The 2AB attached 20 nM *N*-glycans in 800 μL of buffer (20 mM Tris-HCl, 50 mM NaCl at pH 7.4) was titrated by adding ConA, and anisotropy was measured three times after 2 min reaction. The dissociation constant between ConA and *N*-glycans-2AB was obtained using the 1:1 binding model. The overall calculation was measured using the following equations.<sup>6,7</sup>

$$F_{bound} = \frac{r - r_{free}}{r_{bound} - r_{free}} \quad \text{Eq. 1}$$

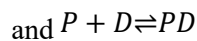

$$K_d = \frac{[P][D]}{[PD]}$$

$$F_{bound} = \frac{P_{total} + D_{total} + K_d - \sqrt{(P_{total} + D_{total} + K_d)^2 - 4P_{total}D_{total}}}{2D_{total}} \quad \text{Eq. 2}$$

where,  $F_{bound}$  (fraction bound) is Fraction of Bound ConA to *N*-glycans-2AB,  $r_{free}$  is anisotropy of unbound *N*-glycans-2AB,  $r_{bound}$  is anisotropy value of ConA-*N*-glycans-2AB bound when saturated, P is the concentration of ConA, D is the concentration of *N*-glycans-2AB, and  $K_d$  is dissociation constant.

### 3. Preparation of Co<sup>2+</sup>-Ca<sup>2+</sup>-concanavalin A

Co<sup>2+</sup>-Ca<sup>2+</sup>-Concanavalin A was prepared by adding 10.0 eq cobalt(II) chloride hexahydrate (Sigma-Aldrich) to Concanavalin A in a buffer solution (20 mM Tris, 50 mM NaCl, 1 mM DTT and pH 7.4) at 4 °C for 1 h to exchange its coordination with manganese ions and cobalt ions. The mixture was filtered using a 10 kDa cut-off membrane filter (Merck Millipore) at 4 °C and centrifuged at 2,095 × *g* to eliminate metal ions not bound to concanavalin A.<sup>8</sup> The mixture was washed at least five times with exchange buffer (20 mM Tris, 50 mM NaCl, 1 mM DTT and pH 7.4) to obtain Co<sup>2+</sup>-Ca<sup>2+</sup>-concanavalin A.

### 4. Preparation of apo-concanavalin A

Apo-ConA was prepared by adding 3 M HCl to Mn<sup>2+</sup>-Ca<sup>2+</sup>-ConA at 4 °C for 2 h to eliminate its coordination with metal ions. The mixture was filtered using a 10 kDa cut-off membrane filter to eliminate metal ions. Apo-ConA was then washed at least five times with exchange buffer (20 mM Tris-HCl and 50 mM NaCl, 1 mM DTT; pH 7.4)

## Supplementary Figures

**Fig. S1** Carbohydrate-binding domain (CBD) of concanavalin A (ConA) in complex with *N*-glycan. Structures of the complex of native ConA with (a) methyl  $\alpha$ -D-mannopyranoside (MMA, green-cyan, PDB: 5CNA) and (b) 4'-nitrophenyl- $\alpha$ -D-mannopyranoside ( $\alpha$ -PNM, pink, PDB: 1VAM) are shown. Purple and green spheres represent  $Mn^{2+}$  and  $Ca^{2+}$  ions, respectively. Unit: Å

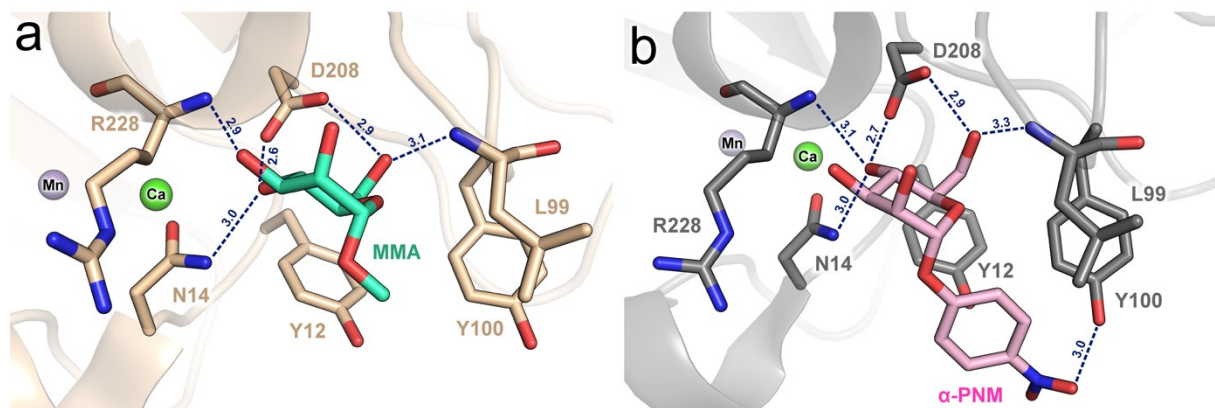

## References

1. Z. Otwinowski and W. Minor, *Meth. Enzymol.*, 1997, **276**, 307-326.
2. N.-J. Chung, Y. R. Park, D.-H. Lee, S.-Y. Oh, J. H. Park and S. J. Lee, *J. Microbiol. Biotechnol.*, 2017, **27**, 2241-2244.
3. P. D. Adams, P. V. Afonine, G. Bunkóczi, V. B. Chen, I. W. Davis, N. Echols, J. J. Headd, L.-W. Hung, G. J. Kapral and R. W. Grosse-Kunstleve, *Acta Crystallogr. D Biol. Crystallogr.*, 2010, **66**, 213-221.
4. P. Emsley and K. Cowtan, *Acta Crystallogr. D Biol. Crystallogr.*, 2004, **60**, 2126-2132.
5. G. N. Murshudov, P. Skubák, A. A. Lebedev, N. S. Pannu, R. A. Steiner, R. A. Nicholls, M. D. Winn, F. Long and A. A. Vagin, *Acta Crystallogr. D Biol. Crystallogr.*, 2011, **67**, 355-367.
6. H. Jang, D.-H. Lee, H. G. Kang and S. J. Lee, *Dalton Trans.*, 2020, **49**, 13538-13543.
7. Y. Hwang, J.-G. Na and S. J. Lee, *Appl. Environ. Microbiol.*, 2023, **89**, e02104-02122.
8. C. Yoon and S. J. Lee, *Bull. Korean Chem. Soc.*, 2021, **42**, 1650-1658.
